# Supplementary material for: Anaplerotic flux into the Calvin–Benson cycle: hydrogen isotope evidence for in vivo occurrence in C3 metabolism
Source: PubMed Central journal article supplement (PMC9305100; doi:10.1111/nph.17957), 2022-02-02
Supplement: NPH-234-405-s001.pdf [file NPH-234-405-s001.pdf]

# Anaplerotic flux into the Calvin-Benson cycle. Hydrogen isotope evidence for *in vivo* occurrence in C<sub>3</sub> metabolism – Supporting information

Thomas Wieloch, Angela Augusti, Jürgen Schleucher (Accepted: 22 December 2021)

## Notes S1. Leaf gas exchange measurements

Gas exchange measurements were performed with a two-channel fast-response system described previously (Laisk & Edwards, 1997). A sandwich-type round chamber enclosed a leaf area of 8.04 cm<sup>2</sup>. Gas flow was maintained at 0.5 mmol s<sup>-1</sup>. Measurements were performed at CO<sub>2</sub> concentrations similar to those applied in the growth chamber over two days ( $C_a=173 \pm 0.1\text{SE}$ ,  $269 \pm 0.1\text{SE}$ ,  $433 \pm 0.1\text{SE}$ ,  $675 \pm 0.2\text{SE}$ ,  $1431 \pm 0.4\text{SE}$  ppm;  $n=8$ ). To maintain temperatures of  $22 \pm 0.5$  °C, the upper leaf side was attached to a thermostated glass window by starch gel. Light was provided by a Schott KL 1500 lamp (Walz Heinz GmbH, Effeltrich, Germany) and measured by a LI-185 quantum sensor (LiCor, Lincoln, USA). Measurements were performed at 300  $\mu\text{mol photons m}^{-2} \text{s}^{-1}$  yielding  $C_i=136 \pm 1\text{SE}$ ,  $202 \pm 4\text{SE}$ ,  $304 \pm 8\text{SE}$ ,  $516 \pm 14\text{SE}$ ,  $1282 \pm 16\text{SE}$  ppm.

## Notes S2. Estimation of intercellular CO<sub>2</sub> concentrations during growth chamber experiments

Figure S1 shows  $C_a$  and  $C_i$  data obtained by gas exchange analysis (black circles). Their relationship is well described by a quadratic equation (dotted line,  $R^2=0.999$ ,  $p<0.001$ ,  $n=5$ ). Based on this equation, we estimated  $C_i$  values of 140, 206, 328, 531, and 1365 ppm for growth chamber treatments of  $C_a=180$ , 280, 450, 700, and 1500 ppm (red circles).

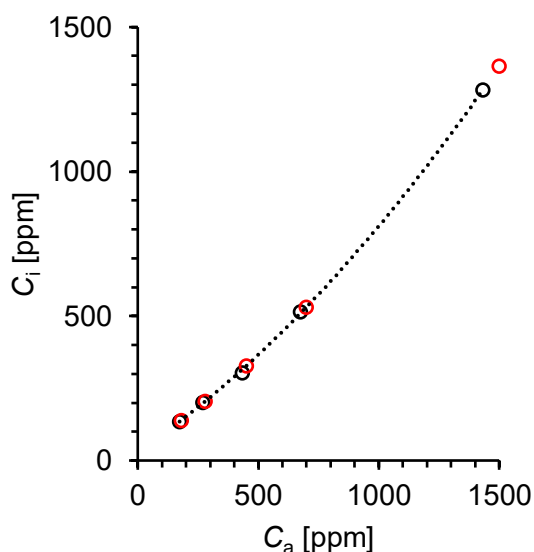

**Figure S1** Ambient and intercellular CO<sub>2</sub> concentrations in *Helianthus annuus* leaves ( $C_a$ , and  $C_i$ , respectively). Black circles: measured values obtained by gas exchange analysis. Black dotted line: quadratic relationship between  $C_a$  and  $C_i$  measurements ( $R^2=0.999$ ,  $p<0.001$ ,  $n=5$ ). Red circles:  $C_i$  values during growth chamber experiments estimated based on the quadratic equation.

### Notes S3. Dilution of isotope signals by remnant starch

The plants studied here were grown at a CO<sub>2</sub> concentration of 450 ppm over 7 to 8 weeks. H<sup>1</sup> and H<sup>2</sup> of starch glucose synthesised under these conditions have  $\delta D$  values of -247‰ and -557‰, respectively (Fig. 3). To drain the starch reserves and avoid dilution by 450 ppm isotope signals, all plants were kept in darkness for 24 hours after transfer to growth chambers. Reportedly, this treatment led to a starch reduction from about 8 to almost 0  $\mu\text{mol glucose g}^{-1}$  FW in *Arabidopsis thaliana* (Smith & Stitt, 2007). Similarly, we found a starch remnant of <0.6  $\mu\text{mol glucose g}^{-1}$  FW in our samples. After two days of acclimation to 1500 ppm, we found a starch content of >171  $\mu\text{mol glucose g}^{-1}$  FW. Thus, at 1500 ppm CO<sub>2</sub>, dilution of isotope signals due to remnant (450 ppm) starch is negligible (0.6/171=4‰).

At 180 ppm, net CO<sub>2</sub> assimilation was lower than at 1500 ppm (5.1 vs. 17.3  $\mu\text{mol m}^{-2} \text{s}^{-1}$ ). Assuming equal relative carbon partitioning under both conditions, dilution of isotope signals in starch synthesised at 180 ppm is small (0.6/(171\*5.1/17.3)=1.2%). H<sup>1</sup> and H<sup>2</sup> of starch glucose synthesised at 180 ppm have apparent  $\delta D$  values of -37‰ and -246‰, respectively (Fig. 3). Accounting for a 1.2% dilution by remnant starch, we estimate actual  $\delta D$  values of -34.4‰ and -242.2‰, respectively. However, sucrose-to-starch carbon partitioning ratios increase as ambient CO<sub>2</sub> concentrations decrease (Sharkey et al. 1985). Thus, at 180 ppm CO<sub>2</sub>, the relative contribution of remnant (450 ppm) starch may be larger, i.e., actual  $\delta D$  values and anaplerotic flux may be somewhat higher than estimated.

### Notes S4. Deuterium fractionation by glucose-6-phosphate dehydrogenase

Modelling of fractionations by glucose-6-phosphate dehydrogenase, G6PD, assumed an open system at steady state and followed published basic procedures (Hayes, 2002). Incoming glucose 6-phosphate, G6P, has two fates, starch biosynthesis or anaplerotic reinjection into the Calvin-Benson cycle via G6PD. D fractionation between the reaction product, 6-phosphogluconolactone (6PGL), and remaining educt, G6P', is given as

$$R_{6\text{PGL}} = \frac{1}{\alpha} R_{\text{G6P}'}, \quad (\text{S1})$$

where  $R$  denotes D/H ratios, and  $\alpha$  denotes D isotope effects of G6PD ( $\alpha_D=2.97$ ) (Hermes *et al.*, 1982). Isotope mass balance of the system is given as

$$F_{G6P} = fF_{6PGL} + (1 - f)F_{G6P'} \quad (S2)$$

where  $F$  denotes fractional abundances ( $D/(H+D)$ ), and  $f$  denotes the 6PGL commitment ( $f$  was varied between 0 and 1).  $F$  and  $R$  relate to each other as

$$F = \frac{R}{1 + R} \quad (S3)$$

Substituting  $F$  for  $R$  in equation S2 yields

$$\frac{R_{G6P}}{1 + R_{G6P}} = f \frac{R_{6PGL}}{1 + R_{6PGL}} + (1 - f) \frac{R_{G6P'}}{1 + R_{G6P'}} \quad (S4)$$

Here, we substitute the unknown D/H ratio of incoming G6P,  $R_{G6P}$ , by the known ratio of Vienna Standard Mean Ocean Water,  $R_{VSMOW}$  ( $155.76 \cdot 10^{-6}$ ) (Hagemann *et al.*, 1970). Consequently, fractionations expressed on the  $\delta$ -scale (Eq. S7) develop from zero. Substituting  $R_{6PGL}$  in equation S4 based on equation S1 then gives

$$\frac{R_{VSMOW}}{1 + R_{VSMOW}} = f \frac{R_{G6P'}/\alpha}{1 + R_{G6P'}/\alpha} + (1 - f) \frac{R_{G6P'}}{1 + R_{G6P'}} \quad (S5)$$

Solving equation S5 for  $R_{G6P'}$  gives

$$c = \frac{-ad - a + b + d - bd \pm Z}{2(a - 1)} \quad (S6)$$

with

$$Z = \sqrt{a^2d^2 - 2ad^2 + b^2d^2 + 2abd^2 - 2bd^2 + d^2 - 2a^2d + 2ad - 2b^2d + 2bd + a^2 + b^2 - 2ab}$$

where  $a$  to  $d$  denote  $R_{VSMOW}/(1+R_{VSMOW})$ ,  $f$ ,  $R_{G6P'}$ , and  $\alpha$ , respectively. While there are two mathematically correct solutions ( $\pm Z$ ), only one of them returns plausible fractionation values ( $-Z$ ). Modelling results were expressed in terms of  $R_{VSMOW}$  as

$$\delta D_{G6P'} = \frac{R_{G6P'}}{R_{VSMOW}} - 1 \quad (S7)$$

### Notes S5. Deuterium fractionation by phosphoglucose isomerase

In the F6P to G6P direction, spinach PGI has a tritium isotope effects,  $\alpha_T$ , of 3 (Noltmann, 1972). The corresponding deuterium isotope effect,  $\alpha_D$ , can be estimated from  $\alpha_T$  as

$$\alpha_D = k_H/k_D = {}^{1.44}\sqrt{\alpha_T} \quad (S8)$$

where  $k_H$  and  $k_D$  denote the reaction rates of the protium and deuterium isotopologues of F6P, respectively (Melander & Saunders, 1980). Based on this relationship, we estimate an  $\alpha_D$  of 2.14 which may cause D depletions at G6P H<sup>2</sup> of about 534‰ ( $1/\alpha_D-1$ ).

For rabbit muscle PGI, Rose and O'Connell (1961) measured an  $\alpha_D$  of 2.22 in the F6P to G6P direction (Table S1) which is similar to the  $\alpha_D$  estimated for spinach PGI. In the G6P to F6P direction, these authors measured an  $\alpha_D$  of 2. From these values, we calculated an equilibrium isotope effect,  $EIE_D$ , of 1.11 in G6P. The kinetic isotope of effect (F6P to G6P direction,  $\alpha_D=2.22$ ) may cause D depletions at G6P H<sup>2</sup> of about 550‰ while the equilibrium isotope effect ( $EIE_D=1.11$ ) may cause D depletions of about 99‰ ( $1/EIE_D-1$ ). Hence, with a shift from kinetic to equilibrium conditions, the D abundance at G6P H<sup>2</sup> may increase by about 451‰.

**Table S1** *In vitro* D isotope effects of PGI (Rose & O'Connell, 1961).

| F6P        |   | G6P         |
|------------|---|-------------|
|            | → | 2.22        |
| <u>0.9</u> | ↔ | <u>1.11</u> |
| 2          | ← |             |

→ kinetic isotope effect, ↔ equilibrium isotope effect. Calculated values underlined.

Note, our discussion implicitly assumes that all hydrogen from F6P H<sup>1R</sup> is transferred to G6P H<sup>2</sup>. However, at 22 °C, spinach PGI transfers only 70% of the hydrogen while the rest undergoes exchange with the medium (F6P to G6P direction) (Noltmann, 1972). To our knowledge, isotope effects of hydrogen loss to the medium and hydrogen uptake from the medium are unknown as is the hydrogen isotope composition of the medium. Furthermore, hydrogen exchange rates are temperature dependent and differ between the forward and

backward reaction of PGI (Rose & O'Connell, 1961; Noltmann, 1972). Thus, isotope fractionation by hydrogen exchange requires further attention.

## References

**Hagemann R, Nief G, Roth E. 1970.** Absolute isotopic scale for deuterium analysis of natural waters. Absolute D/H ratio for SMOW. *Tellus* **22**: 712–715.

**Hayes JM. 2002.** Practice and principles of isotopic measurements in organic geochemistry. [WWW document] URL <https://www.whoi.edu/fileserver.do?id=73290&pt=2&p=74886>. [accessed 29 July 2021].

**Hermes JD, Roeske CA, O'Leary MH, Cleland WW. 1982.** Use of multiple isotope effects to determine enzyme mechanisms and intrinsic isotope effects. Malic enzyme and glucose 6-phosphate dehydrogenase. *Biochemistry* **21**: 5106–5114.

**Laisk A, Edwards GE. 1997.** CO<sub>2</sub> and temperature-dependent induction in C<sub>4</sub> photosynthesis: an approach to the hierarchy of rate-limiting processes. *Functional Plant Biology* **24**: 505–516.

**Melander LCS, Saunders WH. 1980.** *Reaction rates of isotopic molecules*. New York: John Wiley & Sons.

**Noltmann EA. 1972.** 9 Aldose-ketose isomerases. In: Boyer PD, ed. *The Enzymes*. Academic Press, 271–354.

**Rose IA, O'Connell EL. 1961.** Intramolecular hydrogen transfer in the phosphoglucose isomerase reaction. *The Journal of Biological Chemistry* **236**: 3086–3092.

**Smith AM, Stitt M. 2007.** Coordination of carbon supply and plant growth. *Plant, Cell & Environment* **30**: 1126–1149.
